# Supplementary material for: Maternal effects on the development of vocal communication in wild chimpanzees
Source: PubMed Central journal article supplement (PMC9550609; doi:10.1016/j.isci.2022.105152), 2022-09-19
Supplement: mmc1.pdf [file mmc1.pdf]

iScience, Volume 25

## **Supplemental information**

### **Maternal effects on the development of vocal communication in wild chimpanzees**

**Aisha C. Bründl, Cédric Girard-Buttoz, Tatiana Bortolato, Liran Samuni, Mathilde Grampp, Therese Löhrrich, Patrick Tkaczynski, Roman M. Wittig, and Catherine Crockford**

1 Figure S1. Distribution of a simulated normal distribution of zeros a negative binomial GLMM can account for, related to STAR Methods. The red line depicts the number of  
2 zeros in our dataset.

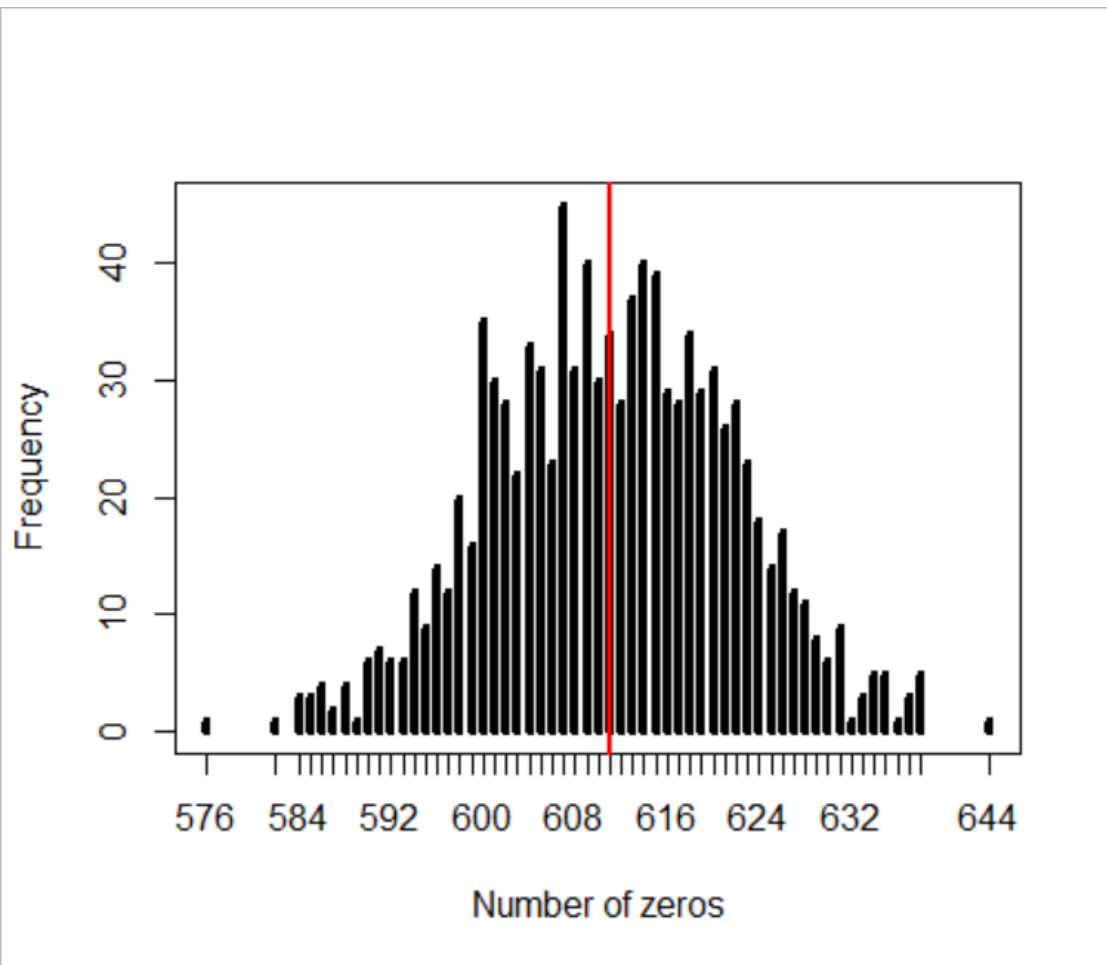

3  
4  
5  
6  
7

8 Figure S2. Distribution of (A) age (years) of the focal chimpanzees in this study and (B) early-life FAI across the three groups (East, North and South), related to STAR Methods.  
9 The boxplots are generated from raw data showing the median, interquartile range, minimum and maximum range, and outliers (N = 792).

10

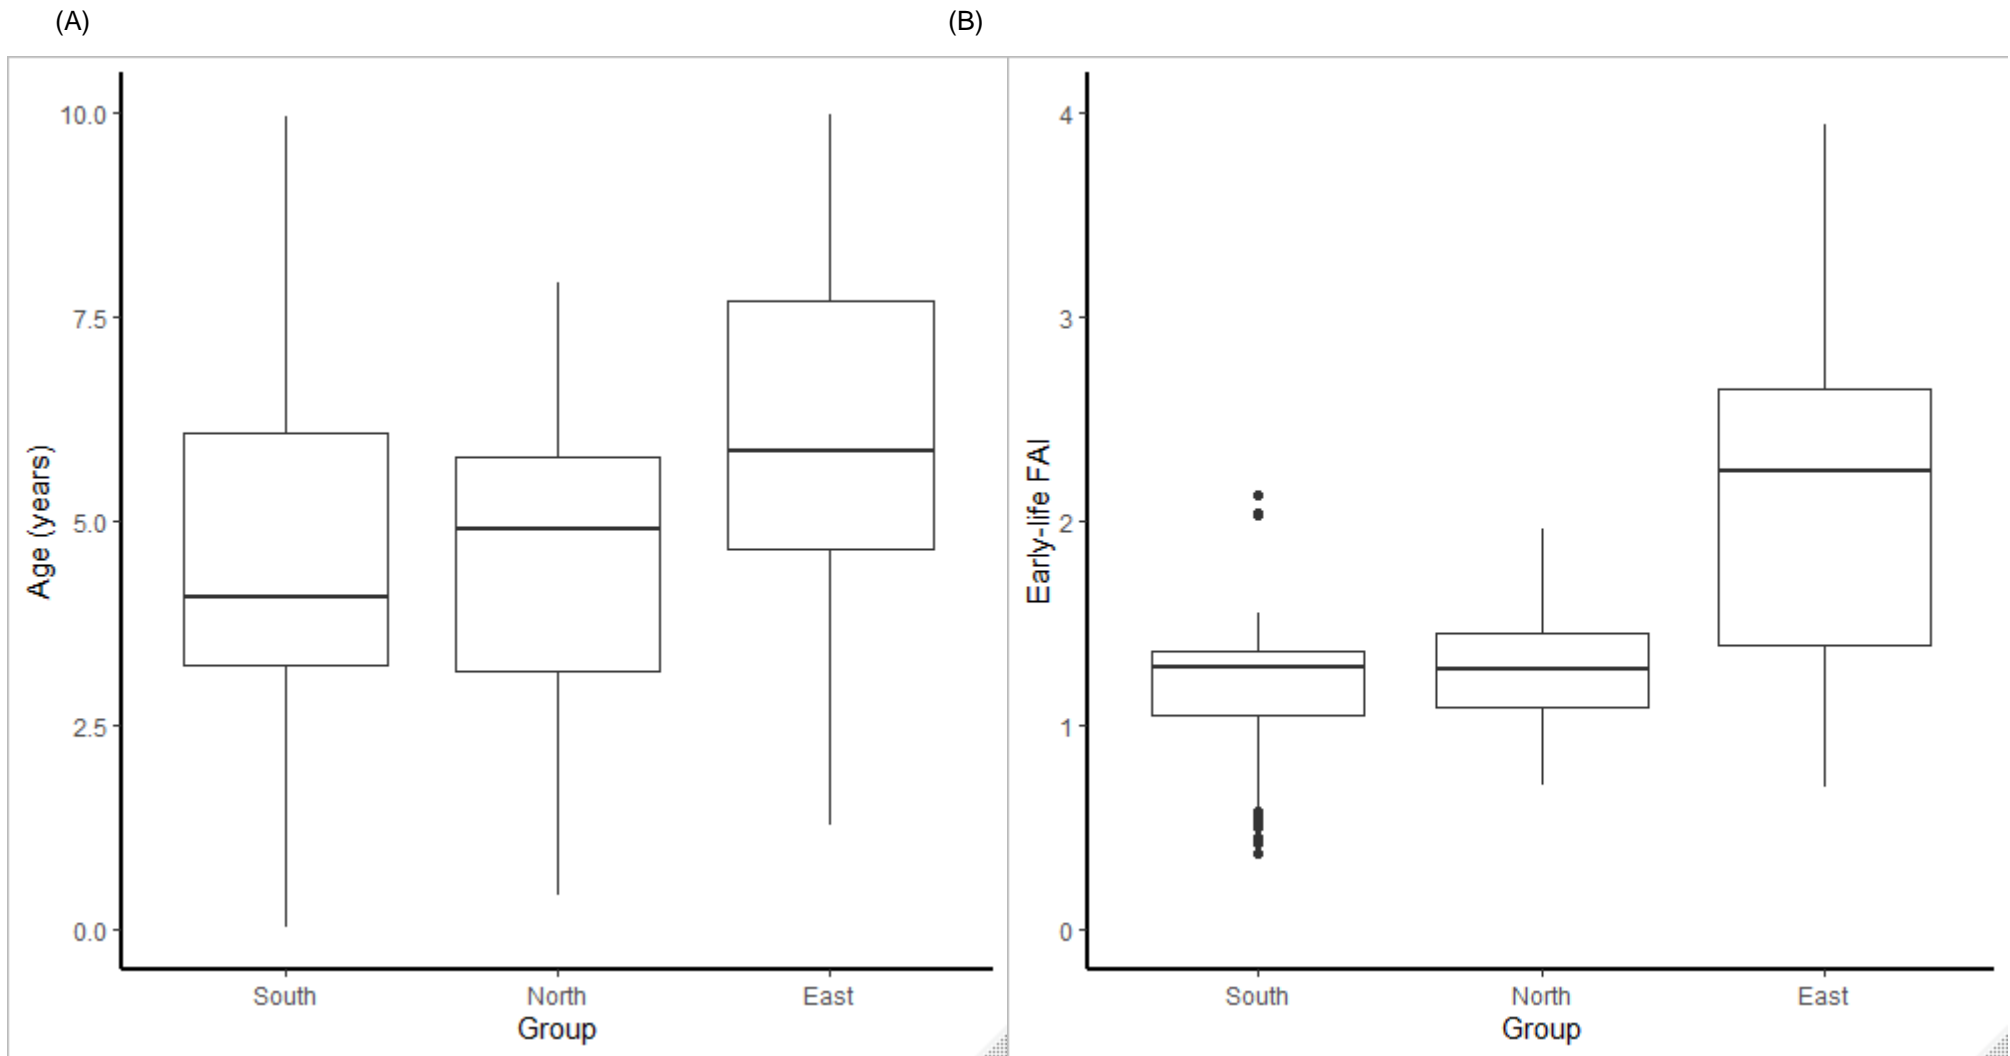

11  
12  
13  
14

15 Table S1. Details of the individual subjects used in this study with associated sample sizes, related to STAR Methods. Sex (M/F), the identity of the Mother, Age (exact or  
16 estimated†) in years when orphaned (blank if not) and across which observations occurred (Minimum – Maximum), total Duration in hours of observational data, total Maternal  
17 duration in hours of observational data (Early and Current observation window) are reported for each subject. † We knew the exact birth date for most individuals (N = 40); for  
18 the other 12 individuals (see Table S1) we knew the month of birth. Some of the first observations were before the 15<sup>th</sup> of the birth month, thus we used the 1st day of the birth  
19 month as an estimated birth date in all cases where we did not know the exact birth date and calculated their ages accordingly.

| Subject      | Sex | Mother       | Age (years) |         |         | Duration (hr) | Maternal duration (hr) |         |
|--------------|-----|--------------|-------------|---------|---------|---------------|------------------------|---------|
|              |     |              | Orphaned    | Minimum | Maximum |               | Early                  | Current |
| ChimpAEast   | F   | MotherAEast  | 4.9         | 4.6     | 8.8     | 293.8         | 277.0                  | 43.2    |
| ChimpBEast   | F   | MotherBEast  | 4.1         | 4.2     | 6.1     | 153.0         | 216.6                  | 19.2    |
| ChimpCEast†  | M   | MotherCEast  | 3.9         | 4.0     | 10.0    | 227.1         | 45.6                   | 160.2   |
| ChimpDEast   | M   | MotherDEast  |             | 3.8     | 6.5     | 52.5          | 306.6                  | 31.2    |
| ChimpEEast   | M   | MotherDEast  |             | 1.4     | 1.8     | 25.8          | 265.8                  | 26.9    |
| ChimpFEast†  | M   | MotherEEast  |             | 5.0     | 7.8     | 58.1          | 341.2                  | 40.0    |
| ChimpGEast   | F   | MotherFEast  | 5.4         | 5.5     | 5.6     | 23.8          | 53.4                   | 8.1     |
| ChimpHEast   | M   | MotherGEast  |             | 1.3     | 2.4     | 35.9          | 307.8                  | 28.2    |
| ChimpIEast   | M   | MotherGEast  |             | 6.2     | 10.0    | 232.2         | 19.7                   | 69.5    |
| ChimpJEast   | F   | MotherGEast  |             | 3.8     | 6.7     | 70.2          | 331.1                  | 41.9    |
| ChimpKEast   | M   | MotherHEast  |             | 1.8     | 1.9     | 21.7          | 328.3                  | 21.6    |
| ChimpLEast†  | F   | MotherIEast  |             | 2.5     | 3.7     | 30.5          | 395.8                  | 28.7    |
| ChimpMEast   | M   | MotherIEast  |             | 4.0     | 9.7     | 328.6         | 86.9                   | 100.7   |
| ChimpNEast   | M   | MotherJEast  |             | 1.3     | 2.4     | 23.4          | 179.9                  | 25.1    |
| ChimpOEast†  | M   | MotherJEast  |             | 7.3     | 10.0    | 69.3          | 32.0                   | 40.8    |
| ChimpANorth  | F   | MotherANorth |             | 1.5     | 1.5     | 8.5           | 120.5                  | 6.7     |
| ChimpBNorth  | F   | MotherBNorth |             | 4.8     | 7.8     | 64.1          | 380.4                  | 212.8   |
| ChimpCNorth† | M   | MotherDNorth |             | 3.3     | 3.4     | 17.3          | 554.3                  | 4.8     |
| ChimpDNorth  | M   | MotherCNorth |             | 2.3     | 5.3     | 65.5          | 601.7                  | 178.6   |
| ChimpENorth  | F   | MotherDNorth |             | 4.2     | 7.2     | 68.3          | 540.7                  | 214.8   |
| ChimpFNorth  | F   | MotherENorth |             | 4.3     | 4.4     | 10.3          | 636.4                  | 7.7     |
| ChimpGNorth  | F   | MotherFNorth |             | 3.3     | 6.3     | 61.5          | 622.8                  | 194.9   |
| ChimpHNorth† | M   | MotherENorth |             | 6.3     | 7.3     | 54.1          | 146.0                  | 275.0   |
| ChimpINorth† | F   | MotherENorth |             | 0.4     | 0.5     | 19.2          | 7.2                    | 7.0     |
| ChimpJNorth  | F   | MotherGNorth |             | 4.9     | 7.9     | 59.2          | 132.5                  | 172.6   |
| ChimpKNorth  | F   | MotherGNorth |             | 4.4     | 4.5     | 13.3          | 608.4                  | 4.1     |
| ChimpLNorth  | F   | MotherGNorth |             | 0.4     | 0.5     | 37.1          | 5.8                    | 4.1     |
| ChimpMNorth  | M   | MotherHNorth |             | 0.5     | 0.6     | 41.0          | 7.9                    | 7.9     |

|              |   |              |     |     |     |       |       |       |
|--------------|---|--------------|-----|-----|-----|-------|-------|-------|
| ChimpASouth  | F | MotherASouth |     | 3.3 | 6.3 | 67.2  | 65.4  | 68.0  |
| ChimpBSouth  | F | MotherASouth |     | 2.0 | 2.8 | 27.2  | 300.5 | 13.9  |
| ChimpCSouth  | F | MotherBSouth | 3.8 | 5.1 | 8.3 | 190.2 | 88.1  | 0.0   |
| ChimpDSouth  | F | MotherCSouth |     | 1.7 | 2.6 | 28.6  | 276.0 | 24.4  |
| ChimpESouth† | M | MotherDSouth |     | 2.3 | 2.5 | 20.5  | 70.1  | 16.1  |
| ChimpFSouth  | M | MotherESouth |     | 3.2 | 7.0 | 207.3 | 466.4 | 97.1  |
| ChimpGSouth  | M | MotherESouth |     | 6.5 | 6.6 | 31.6  | 297.6 | 151.0 |
| ChimpHSouth  | M | MotherFSouth |     | 2.3 | 4.5 | 62.9  | 288.5 | 66.2  |
| ChimpISouth† | F | MotherGSouth |     | 3.0 | 4.0 | 159.8 | 483.2 | 101.2 |
| ChimpJSouth  | F | MotherGSouth |     | 3.3 | 4.1 | 24.4  | 440.5 | 20.1  |
| ChimpKSouth  | F | MotherHSouth |     | 1.8 | 2.6 | 19.9  | 235.7 | 29.3  |
| ChimpLSouth† | F | MotherHSouth |     | 3.3 | 5.5 | 66.7  | 25.9  | 71.5  |
| ChimpMSouth  | F | MotherISouth | 4.1 | 3.3 | 7.4 | 257.9 | 275.9 | 61.0  |
| ChimpNSouth  | M | MotherJSouth |     | 2.1 | 3.0 | 23.9  | 234.1 | 19.5  |
| ChimpOSouth† | M | MotherKSouth | 4.8 | 8.7 | 9.9 | 179.3 | 281.3 | 0.0   |
| ChimpPSouth  | M | MotherLSouth |     | 0.2 | 1.1 | 25.7  | 83.1  | 22.2  |
| ChimpQSouth  | M | MotherLSouth |     | 2.8 | 5.1 | 71.1  | 363.3 | 87.4  |
| ChimpRSouth  | M | MotherMSouth |     | 1.1 | 2.2 | 54.3  | 191.1 | 19.8  |
| ChimpSSouth† | M | MotherNSouth |     | 3.3 | 8.5 | 423.4 | 536.1 | 98.9  |
| ChimpTSouth  | M | MotherOSouth |     | 0.2 | 1.2 | 25.9  | 67.3  | 15.2  |
| ChimpUSouth  | M | MotherOSouth |     | 2.8 | 5.1 | 79.0  | 124.9 | 58.9  |
| ChimpVSouth  | F | MotherPSouth | 4.5 | 8.8 | 9.3 | 64.9  | 75.2  | 0.0   |
| ChimpWSouth  | F | MotherQSouth |     | 0.0 | 1.0 | 26.6  | 40.2  | 36.4  |
| ChimpXSouth  | M | MotherRSouth |     | 1.5 | 2.4 | 22.8  | 234.1 | 28.4  |

20

21

22

23

24

25

26

27

28 Table S2. Current maternal effects on pant-hoot rates from a GLMM with negative binomial error structure and logit link function (N = 595), related to STAR Methods. Statistically  
 29 significant effects ( $P \leq 0.05$ ) appear in bold and the coded level of factors in parenthesis.  $P$  values are derived from likelihood ratio tests based on chi-square ( $\chi^2$ ) values.  $X^2$  and  
 30  $P$  values are not indicated in the first row because of having a very limited interpretation. All continuous predictors are z-transformed to a mean of 0 and a standard deviation of  
 31 1. Degrees of freedom are 1 for all predictors.

| Predictors                       | Reference category | Estimate      | $\pm$ SE     | Lower 95% CI  | Upper 95% CI  | Z value       | $X^2$         | $P$ value        |
|----------------------------------|--------------------|---------------|--------------|---------------|---------------|---------------|---------------|------------------|
| Intercept                        |                    | <b>-2.842</b> | <b>0.296</b> | <b>-3.590</b> | <b>-2.327</b> | <b>-9.612</b> | -             | -                |
| <i>Test predictors</i>           |                    |               |              |               |               |               |               |                  |
| Focal age                        |                    | <b>1.072</b>  | <b>0.189</b> | <b>0.727</b>  | <b>1.443</b>  | <b>5.666</b>  | <b>28.972</b> | <b>&lt;0.001</b> |
| Sex (Male)                       | Female             | <b>-0.706</b> | <b>0.312</b> | <b>-1.366</b> | <b>-0.124</b> | <b>-2.259</b> | <b>5.679</b>  | <b>0.017</b>     |
| Current maternal presence        |                    | 0.035         | 0.105        | -0.102        | 0.707         | 0.335         | 0.142         | 0.706            |
| Current maternal gregariousness  |                    | -0.090        | 0.143        | -0.409        | 0.182         | -0.630        | 0.399         | 0.528            |
| Current maternal dominance rank  |                    | 0.116         | 0.216        | -0.316        | 0.595         | 0.538         | 0.288         | 0.592            |
| Current maternal pant-hoot rate  |                    | 0.126         | 0.102        | -0.169        | 0.339         | 1.243         | 1.381         | 0.240            |
| <i>Control predictors</i>        |                    |               |              |               |               |               |               |                  |
| Current FAI                      |                    | 0.032         | 0.171        | -0.311        | 0.312         | 0.187         | 0.036         | 0.851            |
| Current party size               |                    | <b>0.287</b>  | <b>0.134</b> | <b>0.012</b>  | <b>0.507</b>  | <b>2.136</b>  | <b>4.837</b>  | <b>0.028</b>     |
| Current number of older siblings |                    | 0.105         | 0.168        | -0.230        | 0.435         | 0.624         | 0.405         | 0.525            |

44 Figure S3. Maternal presence as a daily proportion the mother was present in the immature chimpanzee's current party with age (years), related to STAR Methods. The average  
45 daily proportion the mother was present was 0.98. The points show raw values (N = 595).

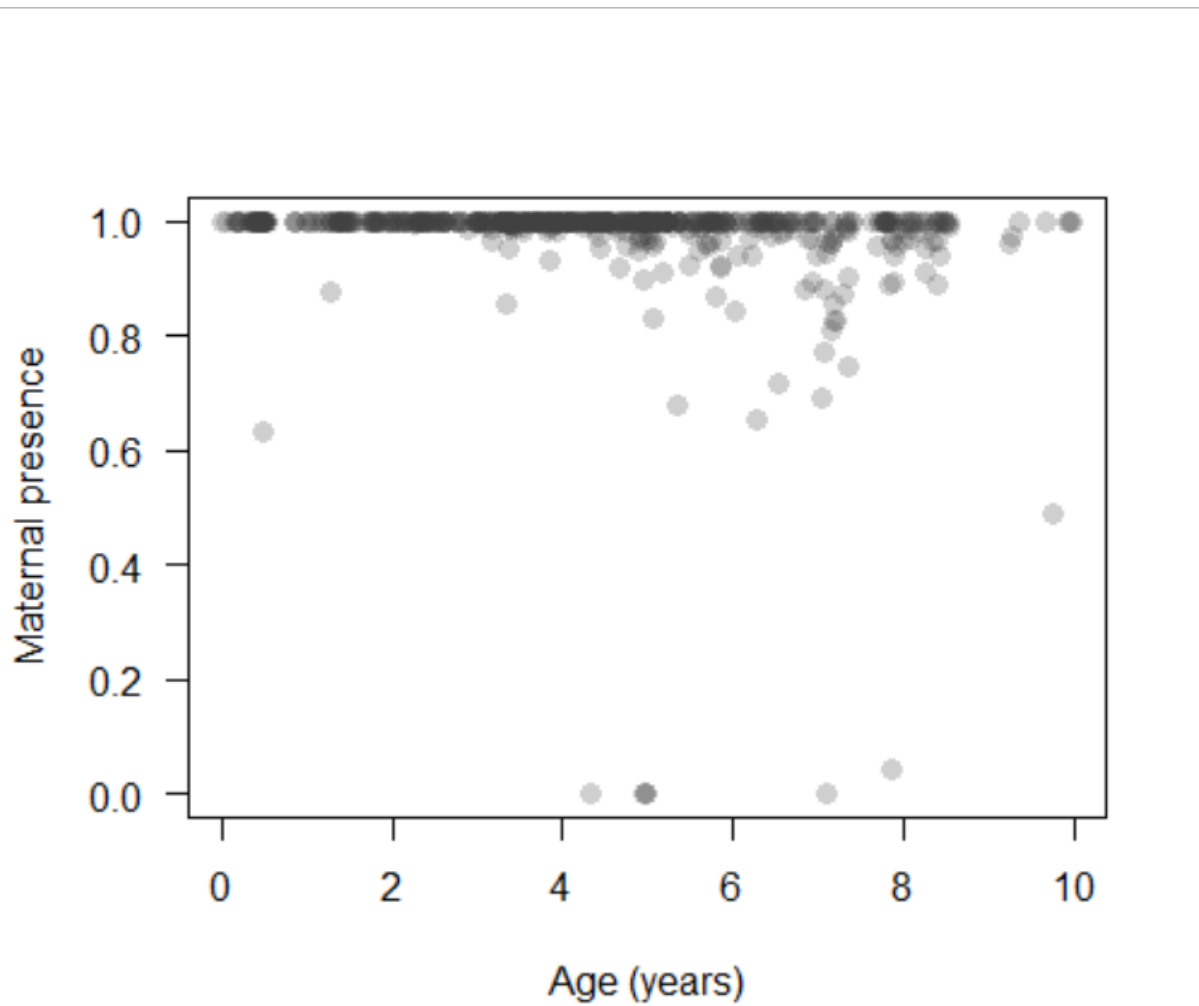

46

47
